# Supplementary material for: Validation of a 5‐Year Prognostic Model for Parkinson's Disease
Source: PubMed Central journal article supplement (PMC11542283; doi:10.1002/mdc3.14215), 2024-09-29
Supplement: MDC3-11-1441-s001.pdf [file MDC3-11-1441-s001.pdf]

|                  | Age           | N (%) Male  | MDS-UPDRS     | ACE-R        | Years since PD Diagnosis | Prognostic Scores |
|------------------|---------------|-------------|---------------|--------------|--------------------------|-------------------|
| <b>Visit 1</b>   |               |             |               |              |                          |                   |
| Included (n=198) | 67.88 (9.11)  | 131 (66.16) | 43.34 (15.32) | 90.72 (5.85) | 0.26 (0.31)              | 0.59 (0.25)       |
| LFU (n=47)       | 67.97 (10.48) | 29 (61.7)   | 47.87 (16.53) | 89.51 (7.11) | 0.24 (0.37)              | 0.59 (0.27)       |
| P-Value          | 0.87          | 0.56        | 0.04*         | 0.38         | 0.15                     | 0.95              |
| <b>Visit 2</b>   |               |             |               |              |                          |                   |
| Included (n=133) | 68.35 (8.04)  | 89 (66.92)  | 48.85 (18.45) | 91.25 (5.80) | 2.05 (0.48)              | 0.60 (0.25)       |
| LFU (n=29)       | 66.66 (9.81)  | 20 (68.97)  | 49.27 (4.91)  | 91.24 (4.91) | 2.14 (0.57)              | 0.57 (0.24)       |
| P-Value          | 0.33          | 0.83        | 0.71          | 0.81         | 0.62                     | 0.50              |
| <b>Visit 3</b>   |               |             |               |              |                          |                   |
| Included (n=78)  | 68.93 (8.66)  | 52 (66.67)  | 49.39 (20.93) | 90.17 (7.21) | 3.73 (0.59)              | 0.67 (0.24)       |
| LFU (n=28)       | 71.39 (8.39)  | 20 (71.43)  | 53.78 (14.10) | 91.61 (6.07) | 3.7 (0.64)               | 0.63 (0.26)       |
| P-Value          | 0.24          | 0.65        | 0.21          | 0.44         | 0.67                     | 0.43              |
